# Supplementary material for: Design of a novel dual function membrane microreactor for liquid–liquid–liquid phase transfer catalysed reaction: selective synthesis of 1-naphthyl glycidyl ether
Source: Royal Society of Chemistry journal article supplement (doi:10.1039/d1re00030f), 2021-01-01
Supplement: d1re00030f1.pdf [file d1re00030f1.pdf]

## Reaction Chemistry & Engineering

### Supporting Information

#### **Design of Novel Dual Function Membrane Microreactor for Liquid-Liquid-Liquid Phase Transfer Catalysed Reaction: Selective Synthesis of 1-Naphthyl Glycidyl Ether**

Nikhil H. Margi and Ganapati D. Yadav\*

Department of Chemical Engineering, Institute of Chemical Technology,

Nathalal Parekh Marg, Matunga,

Mumbai 400019, India

\* E-mail: [gd.yadav@ictmumbai.edu.in](mailto:gd.yadav@ictmumbai.edu.in)

Tel: +91-22-3361-1001. Fax: +91-22-3361-1002.

\*Author to whom correspondence should be addressed

#### **ORCID**

Nikhil H. Margi: 0000-0002-0106-2057

Ganapati D. Yadav: 0000-0002-8603-3959

## Dual Function Membrane Microreactor (DFMMR) System

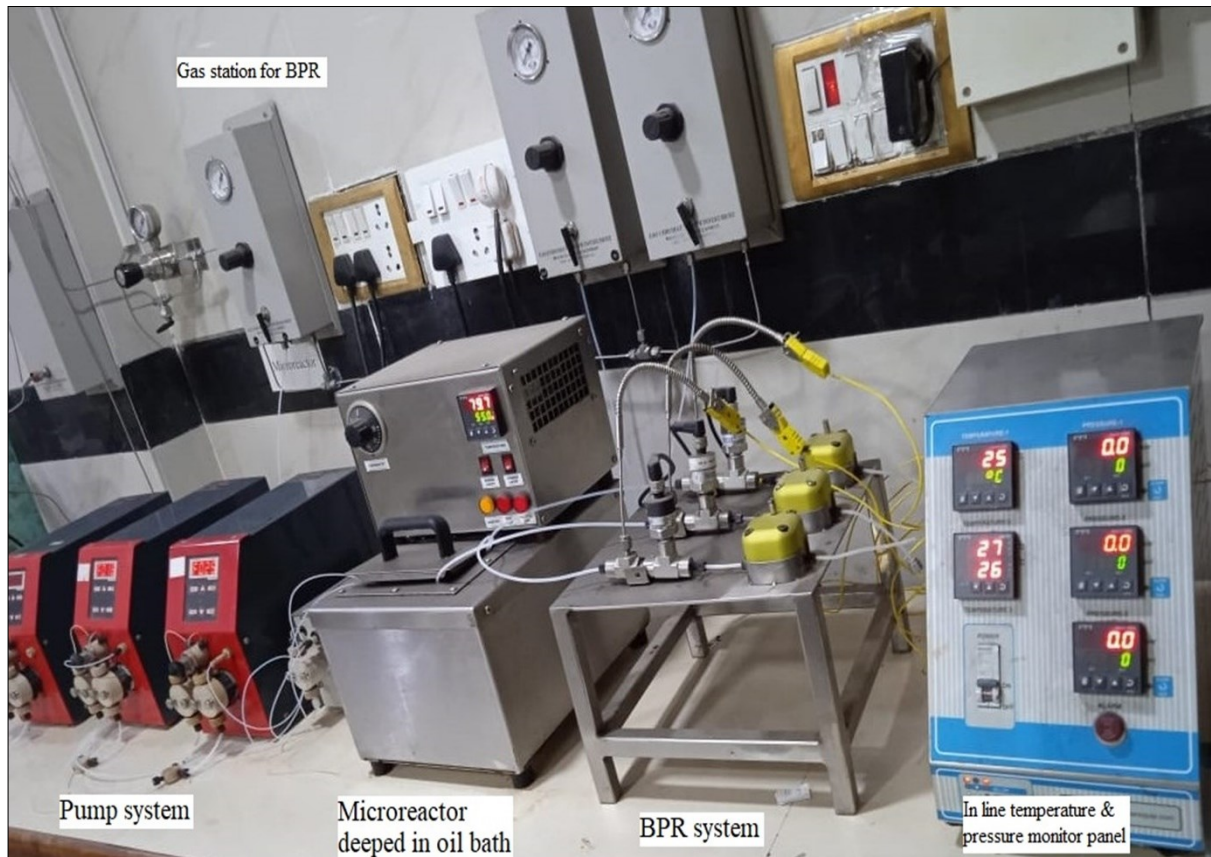

**Figure S1.** Actual photo of the dual function microreactor system

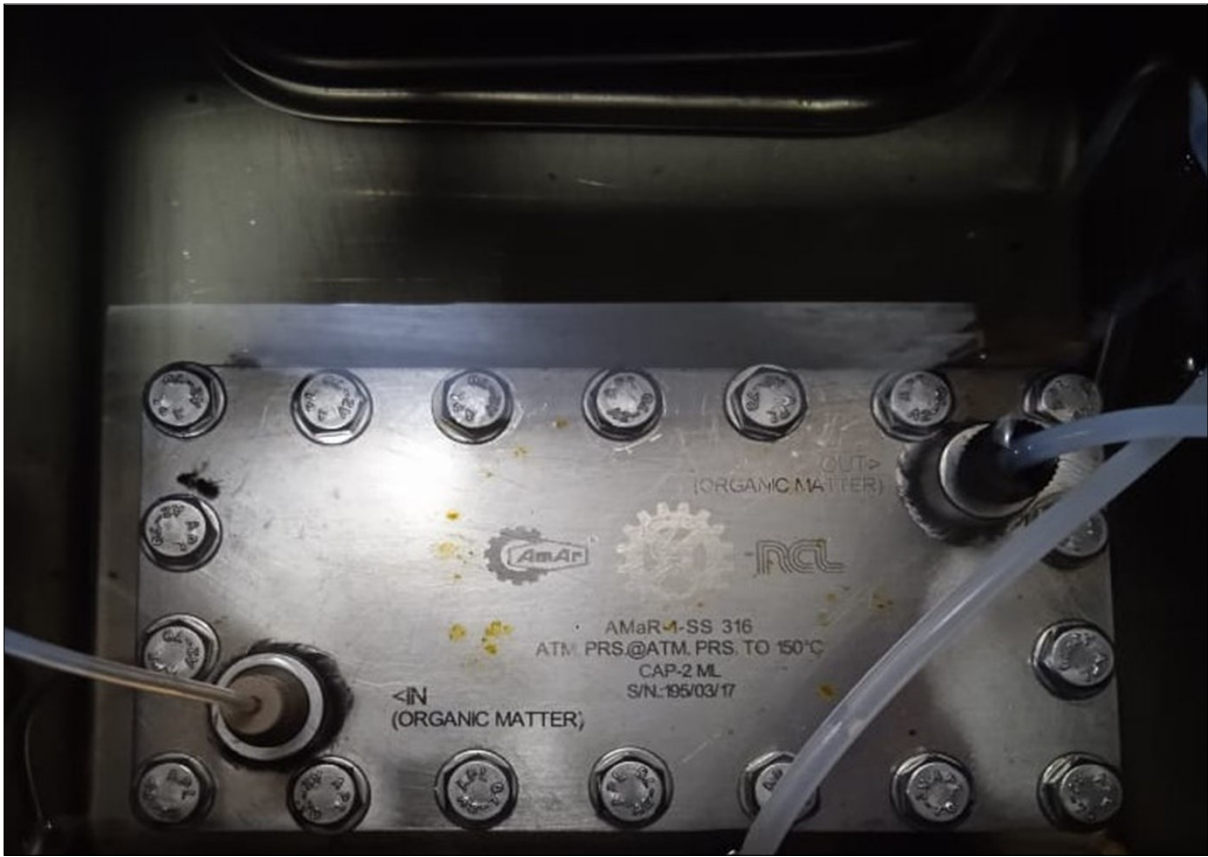

**Figure S2.** Dual function microreactor deep in the oil bath.

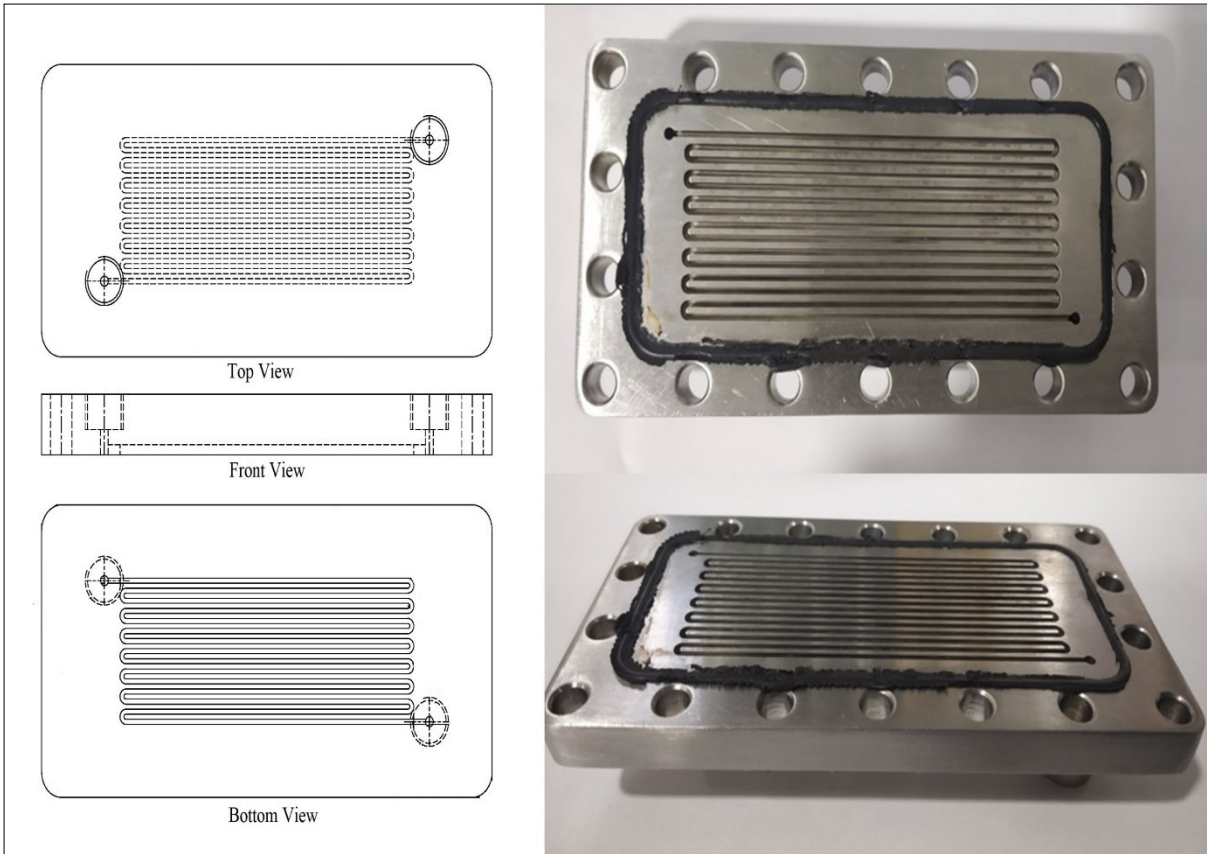

**Figure S3.** Schematic diagram of the upper plate microchannels.

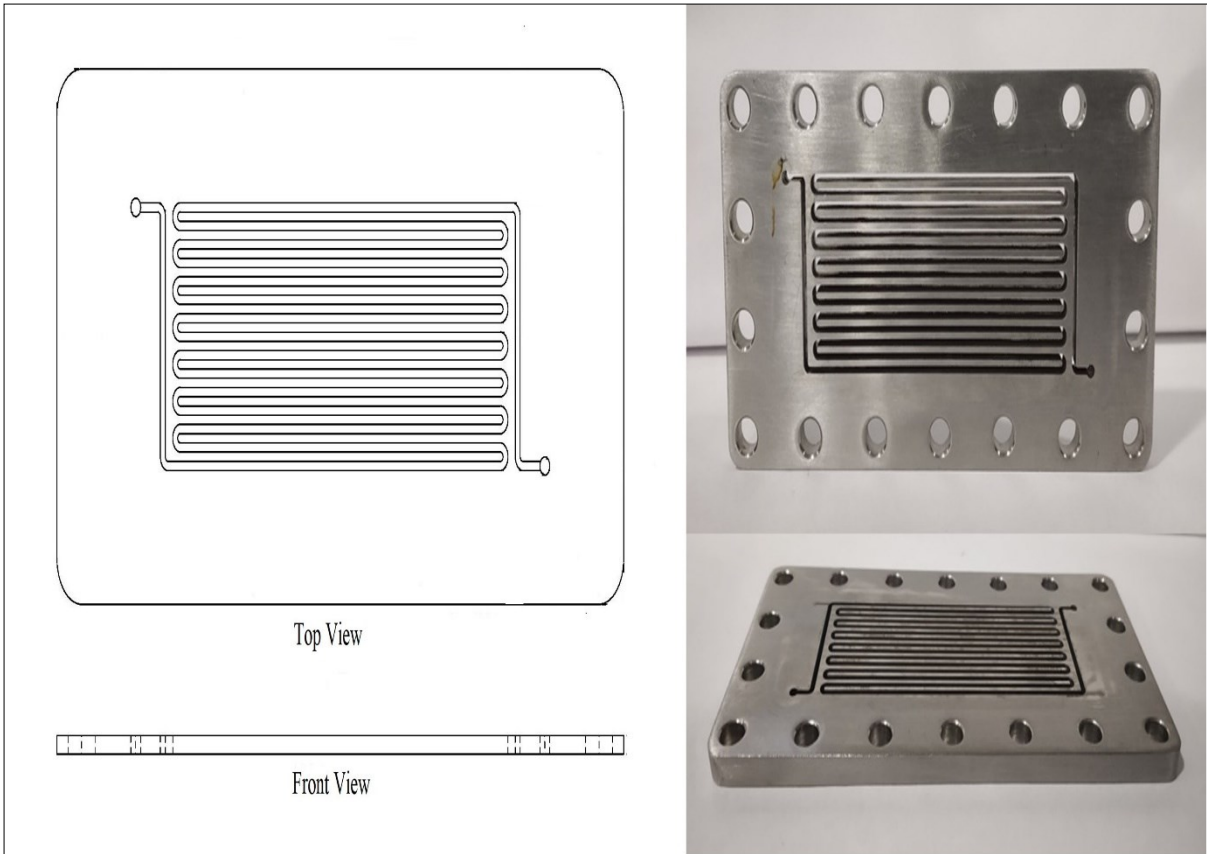

**Figure S4.** Schematic diagram of the middle plate microchannels.

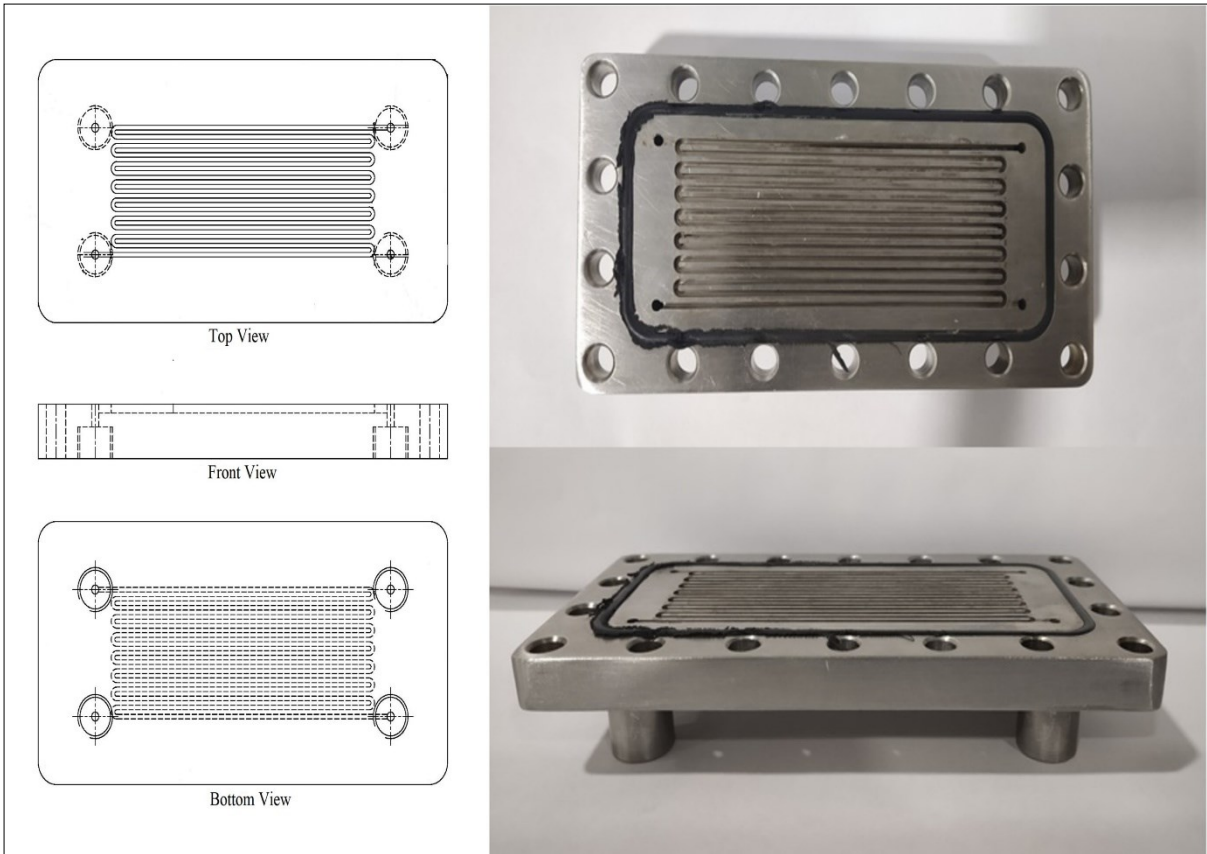

**Figure S5.** Schematic diagram of the lower plate microchannels.

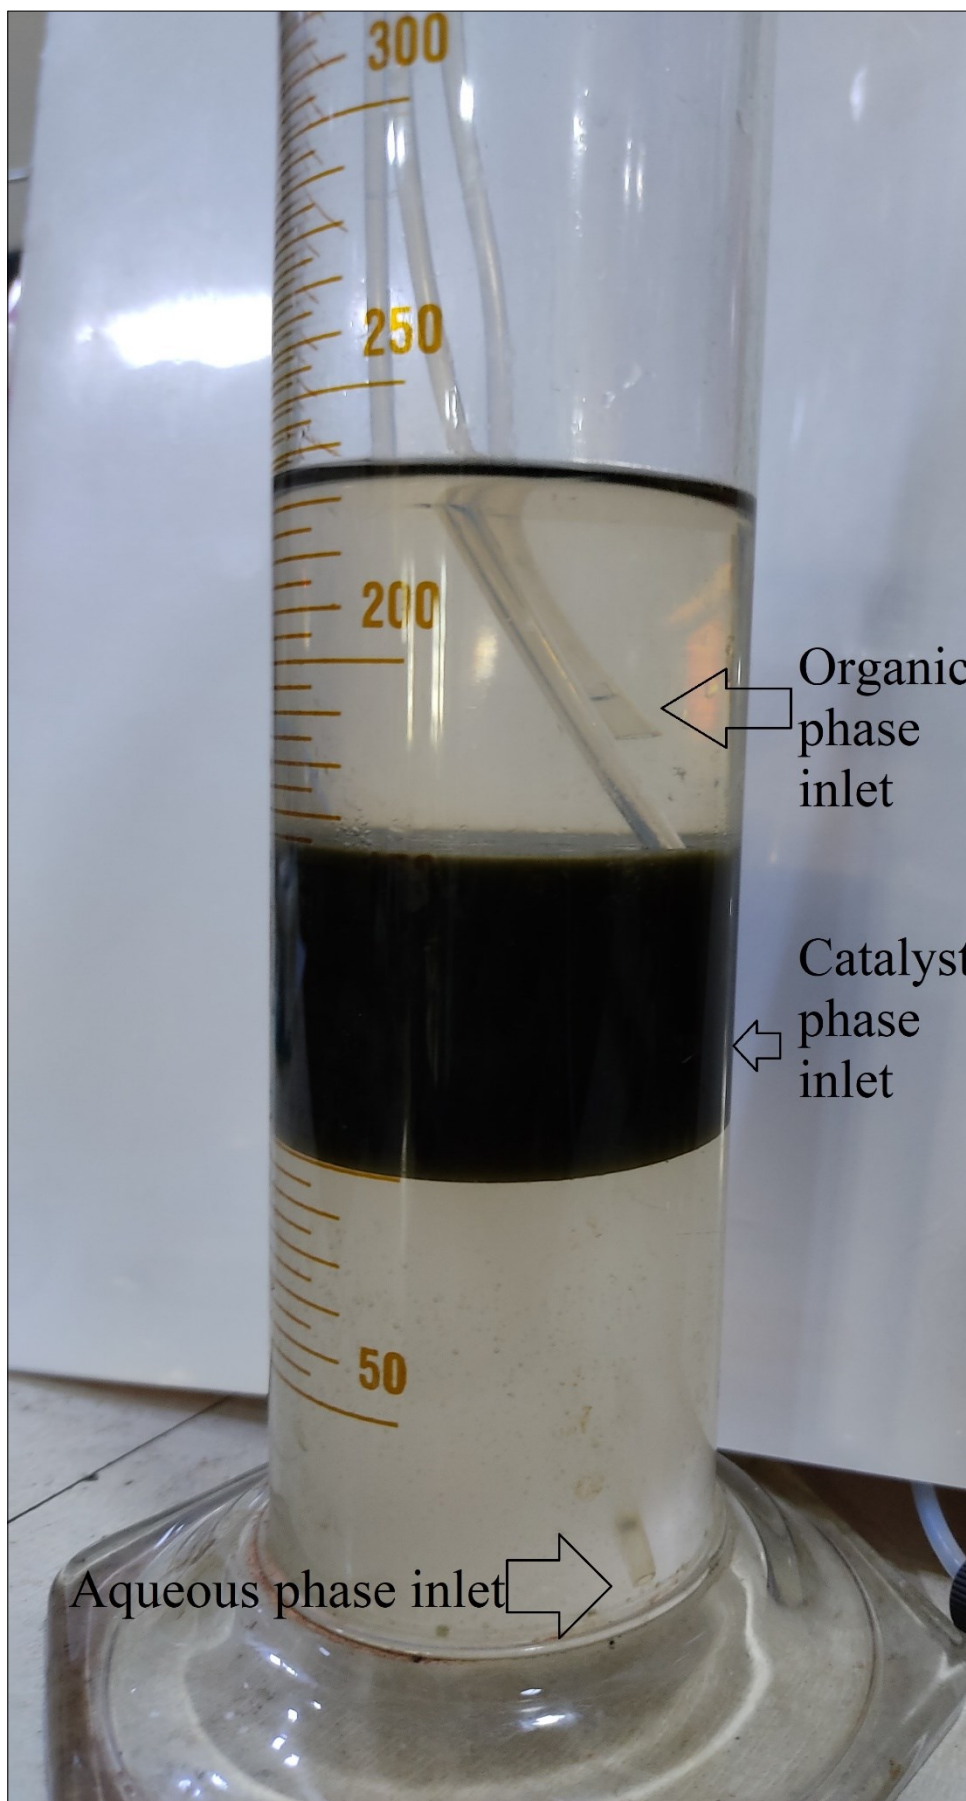

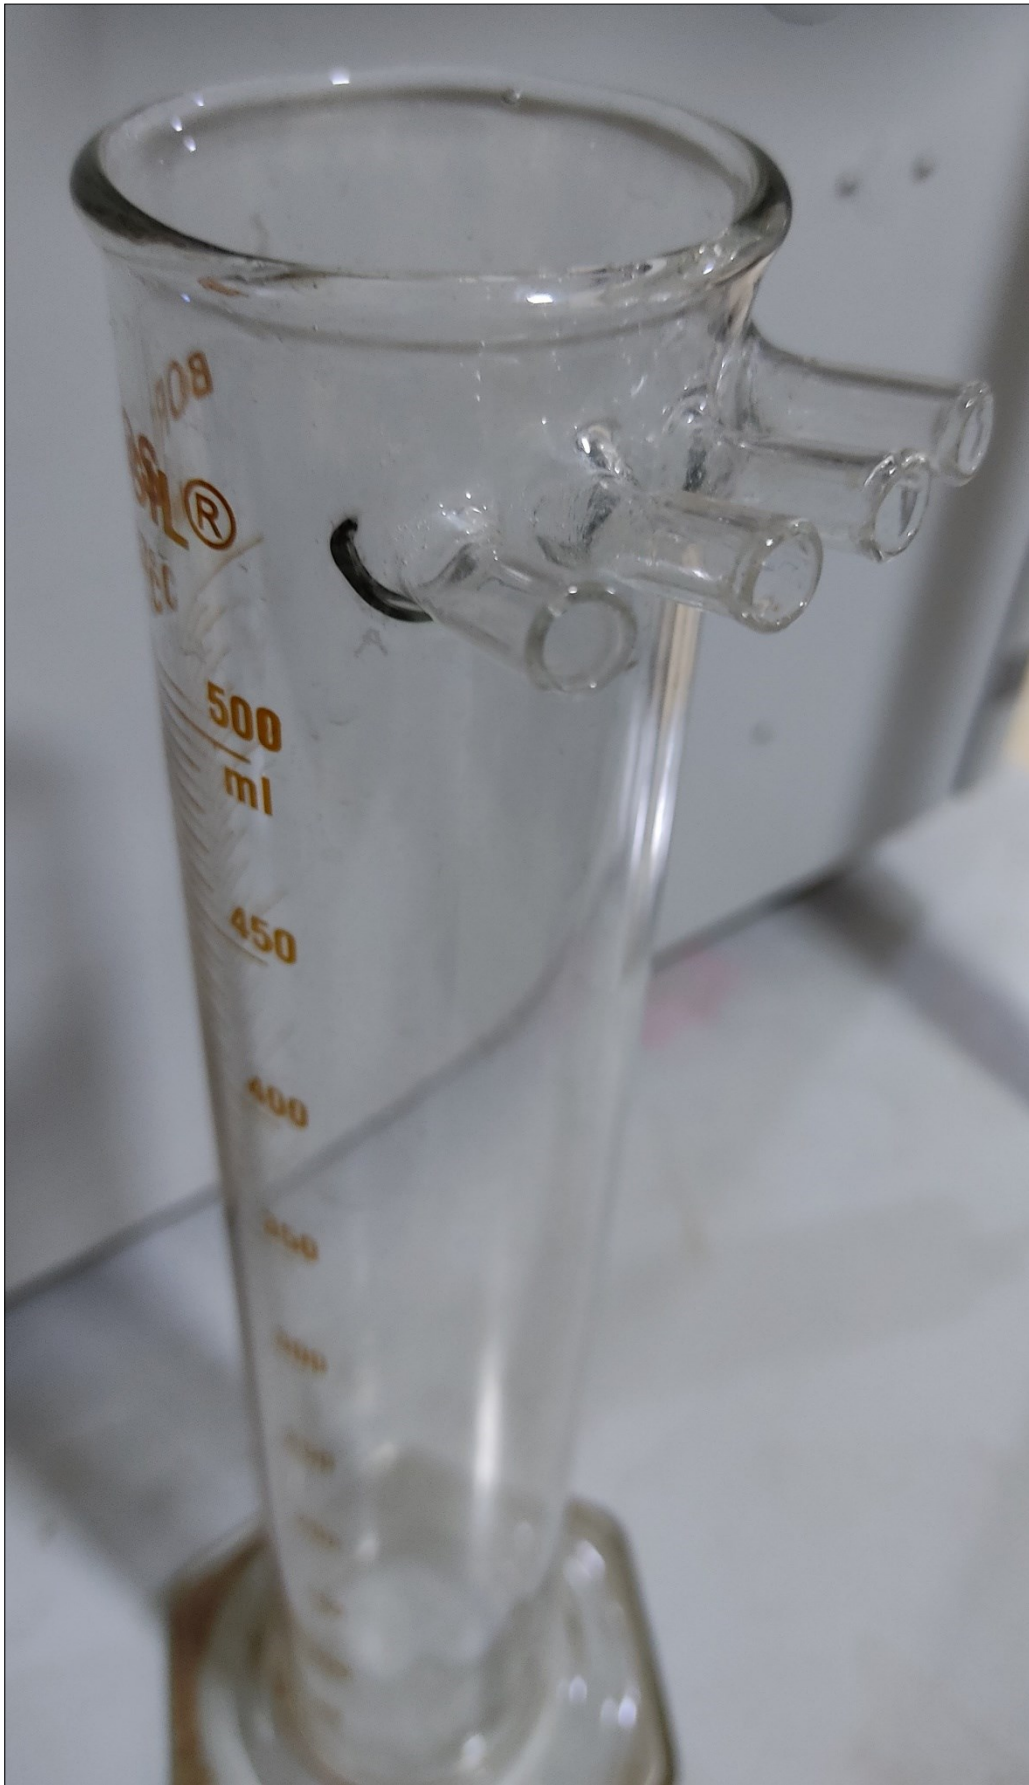

**Figure S6.** Actual photographs of the feed vessel.



## GC analysis

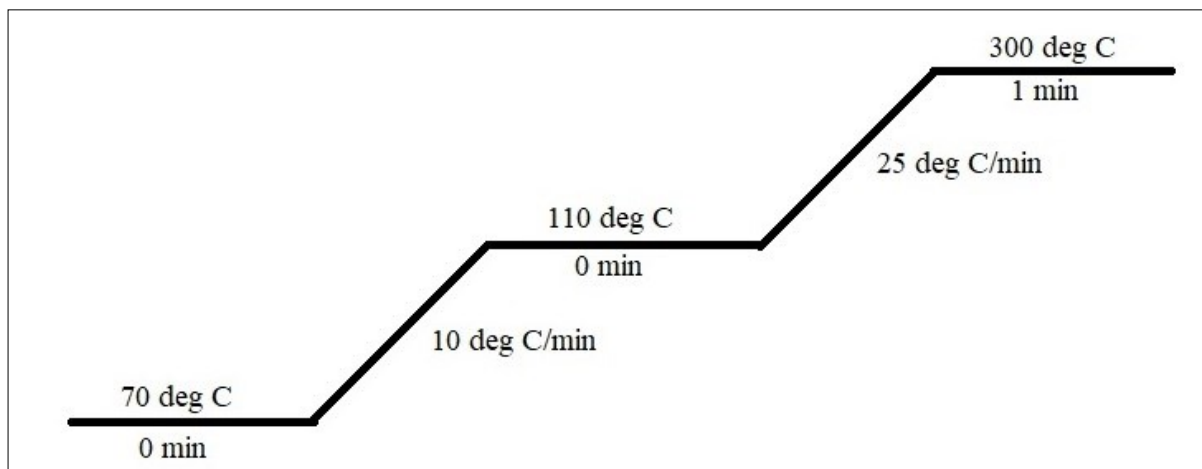

Figure S7. GC method.

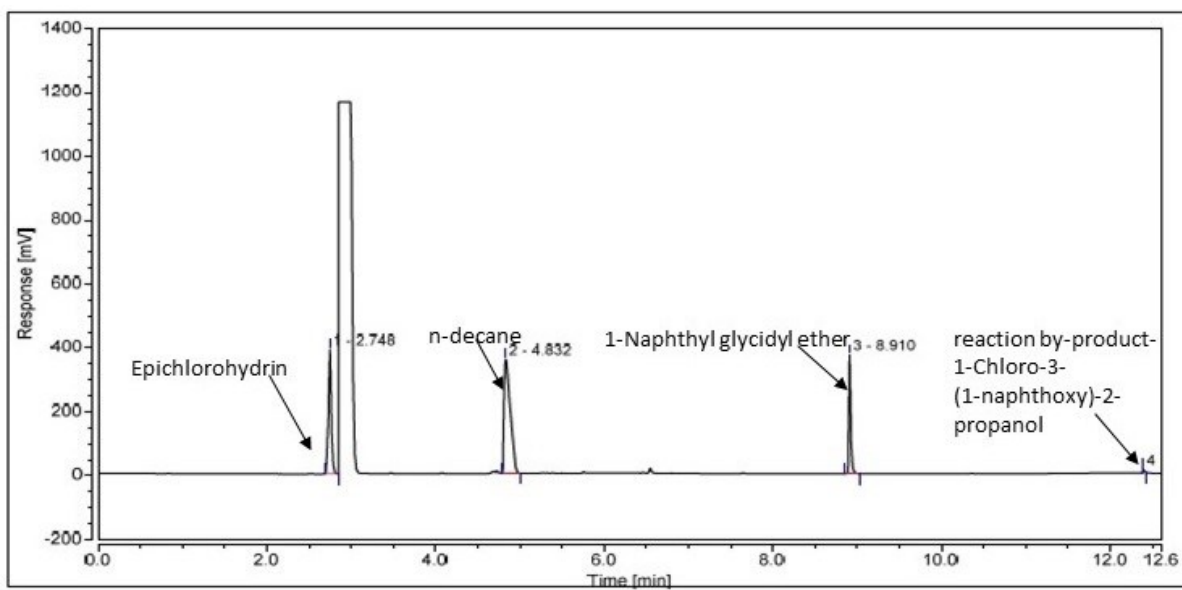

Figure S8. Typical GC chromatogram of reaction mass.

## GCMS analysis

The Thermo Scientific Q Exactive Orbitrap GC-MS (HRMS) was used for the confirmation of the product. Following were the MS spectrums for all the GC peaks, including A) Epichlorohydrin, B) 1-Naphthyl glycidyl ether, C) reaction by-product- 1-Chloro-3-(1-naphthoxy)-2-propanol, D) n-Decane.

### A) Epichlorohydrin

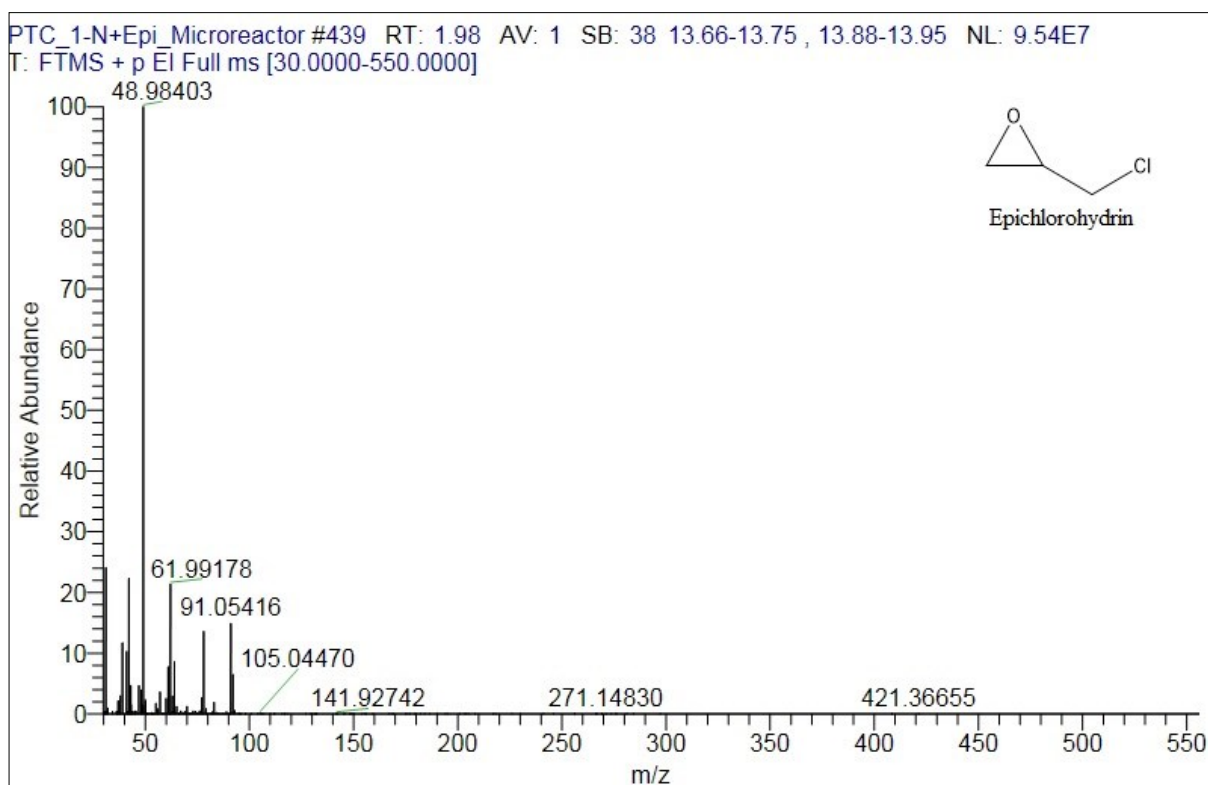

## B) 1-Naphthyl glycidyl ether

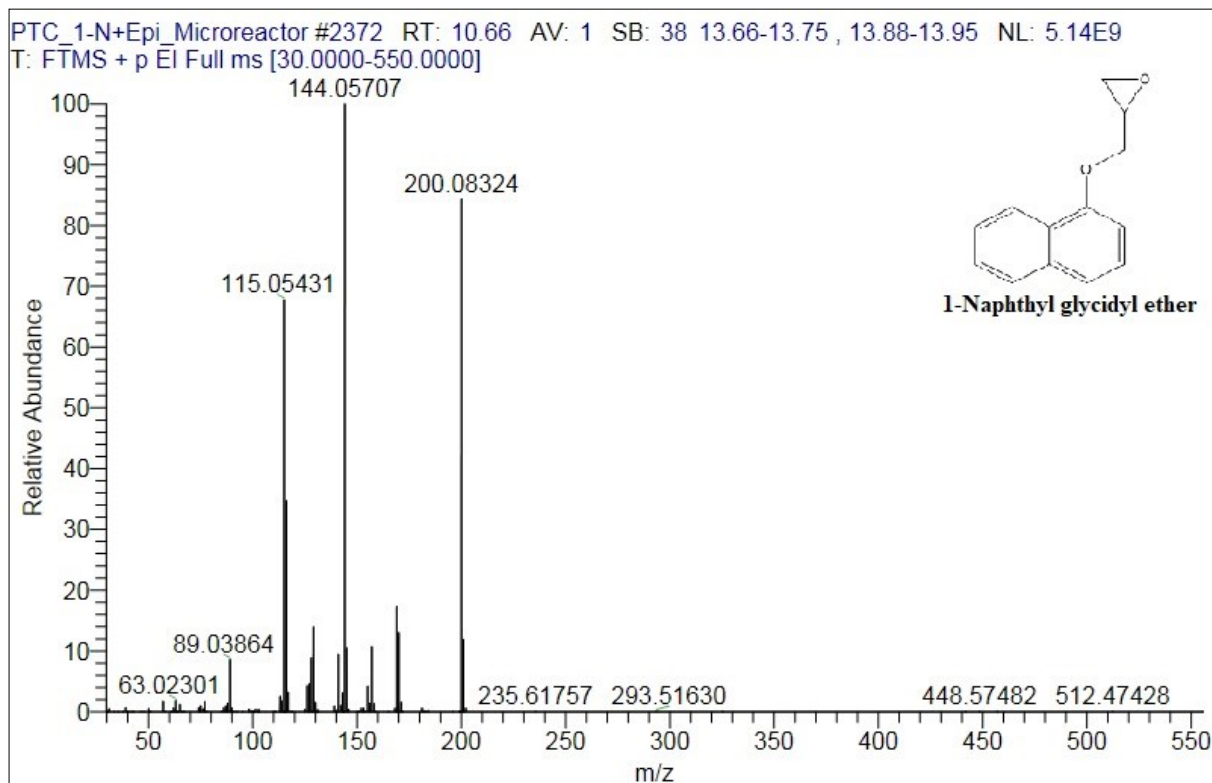

## C) Reaction by-product- 1-Chloro-3-(1-naphthoxy)-2-propanol

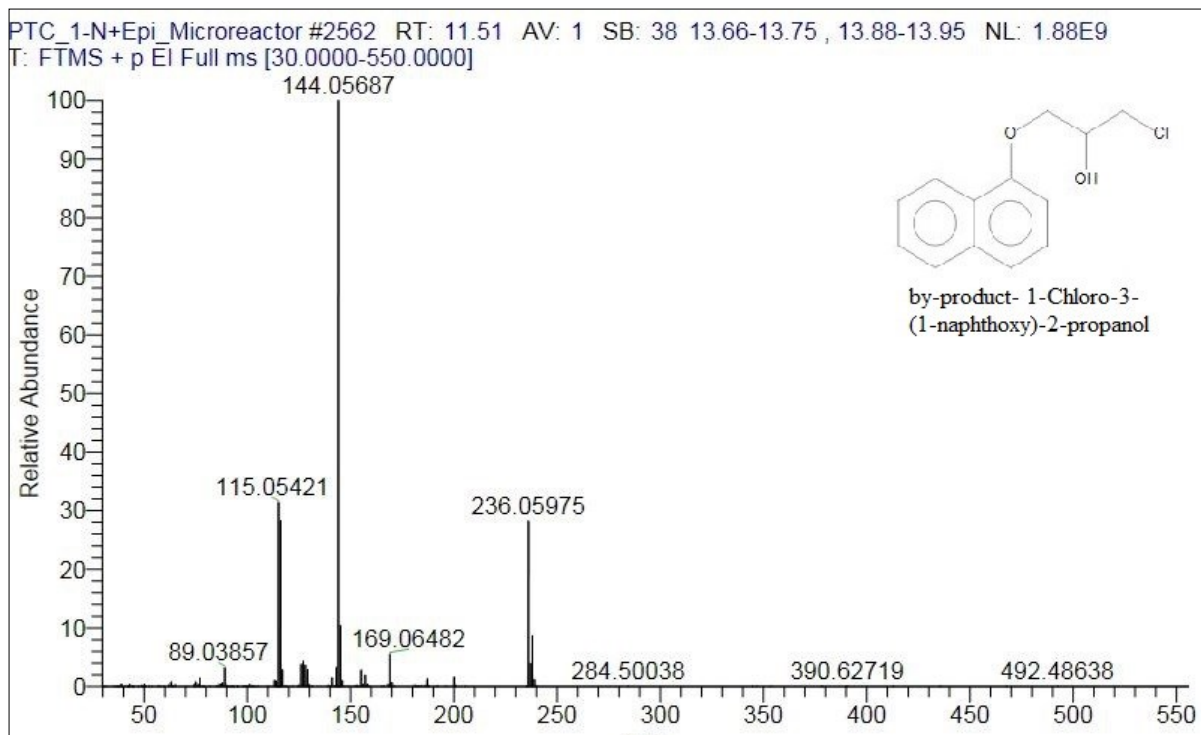

D) n-Decane.

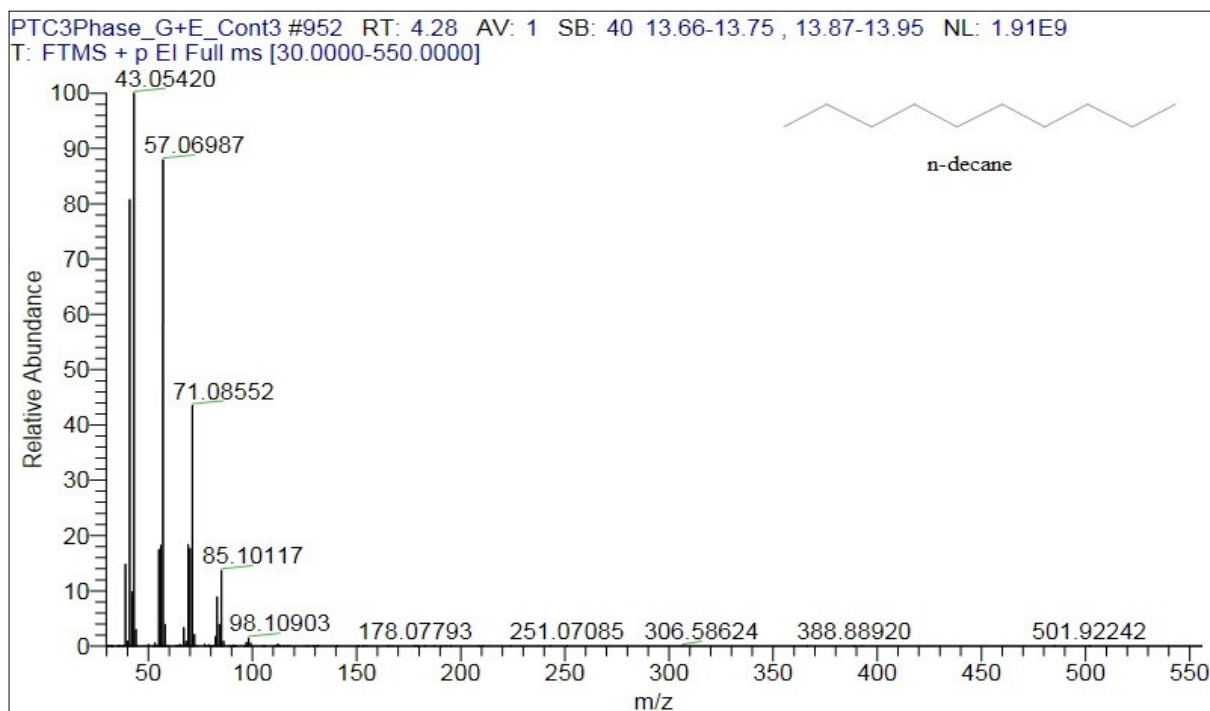

**Figure S9.** GCMS spectra of A) Epichlorohydrin, B) 1-Naphthyl glycidyl ether, C) reaction by-product- 1-Chloro-3-(1-naphthoxy)-2-propanol, and D) n-Decane.

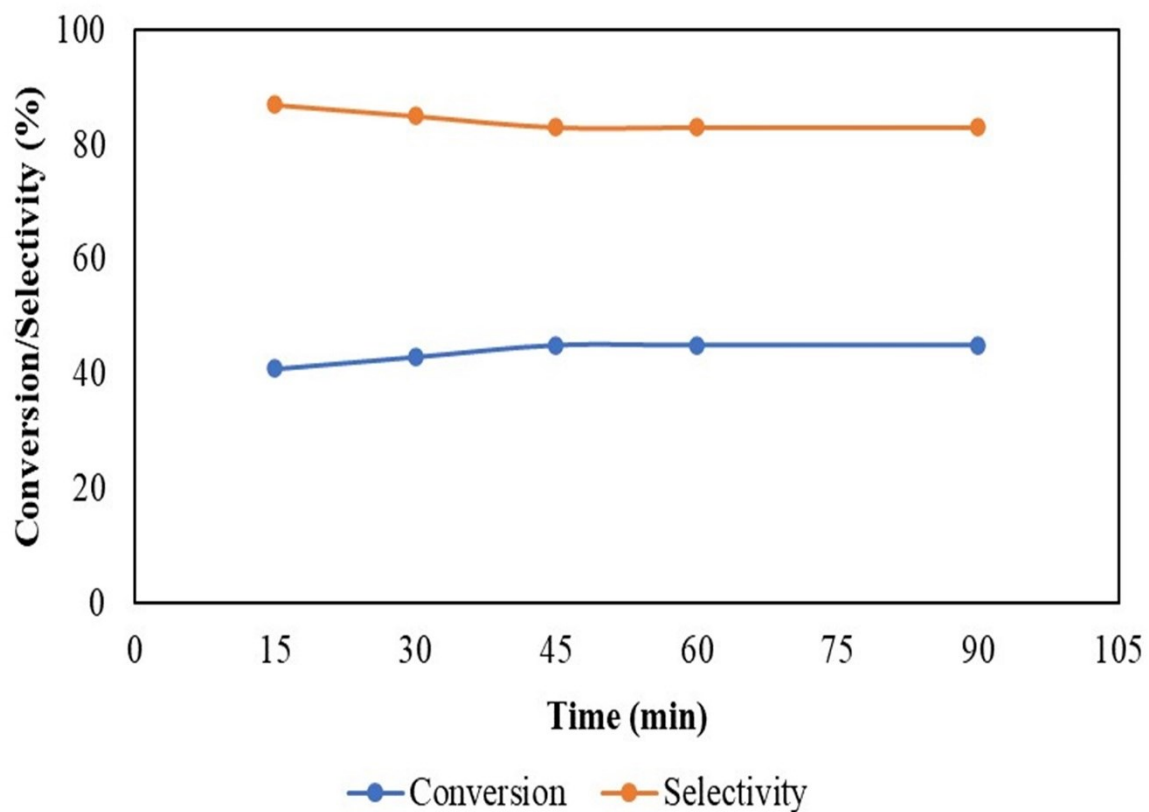

**Figure S10.** Synthesis of 1-naphthyl glycidyl ether in a batch reactor (normal glass reactor). Epichlorohydrin 0.08 mol, n-decane 0.016 mol, toluene 100 mL, 1-naphthol 0.08 mol, sodium hydroxide 0.16 mol, sodium chloride 0.39 mol and tetra butyl ammonium bromide 0.09 mol, water 100 mL, temperature- 30 °C, speed of agitation for batch reactor 1000 rpm.

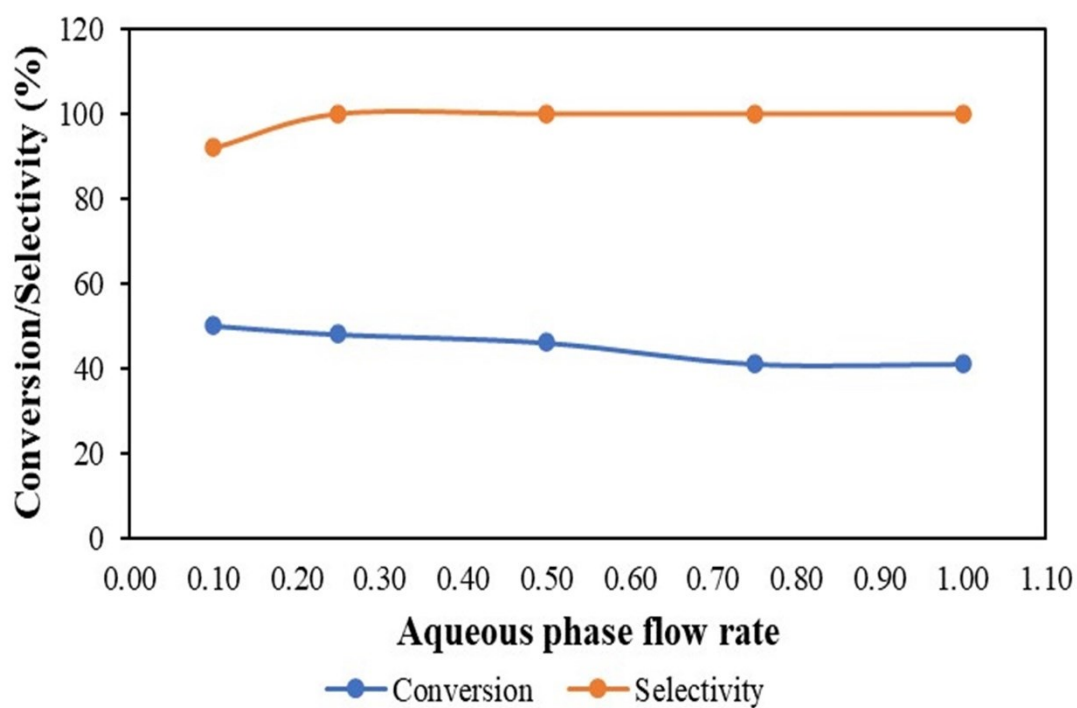

**Figure S11.** Effect of aqueous phase flow rate. 1-Naphthol 0.08 mol, sodium hydroxide 0.16 mol, epichlorohydrin 0.08 mol, tetra butyl ammonium bromide 0.09 mol, n-decane 0.016 mol, sodium chloride 0.39 mol, toluene 100 mL, water 100 mL, catalyst phase flow rate- 1.25 mL/min, organic phase flow rate- 0.5 mL/min, temperature- 30 °C.

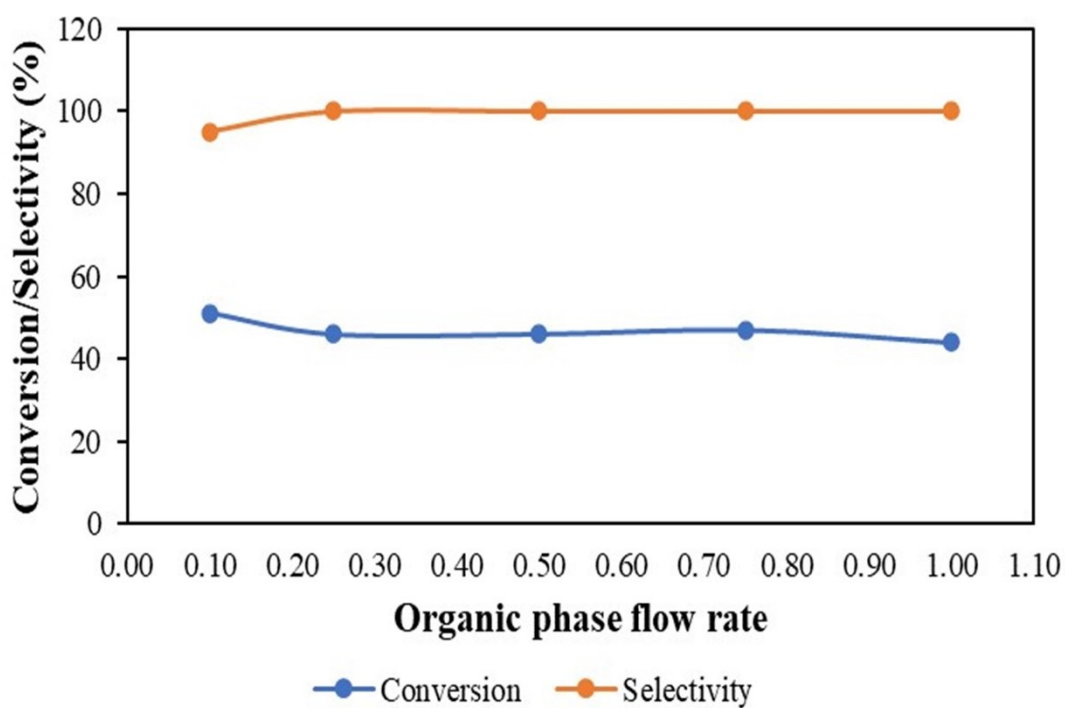

**Figure S12.** Effect of organic phase flow rate. 1-Naphthol 0.08 mol, sodium hydroxide 0.16 mol, epichlorohydrin 0.08 mol, tetra butyl ammonium bromide 0.09 mol, n-decane 0.016 mol, sodium chloride 0.39 mol, toluene 100 mL, water 100 mL, aqueous phase flow rate- 0.5 mL/min, catalyst phase flow rate- 1.25 mL/min, temperature- 30 °C.

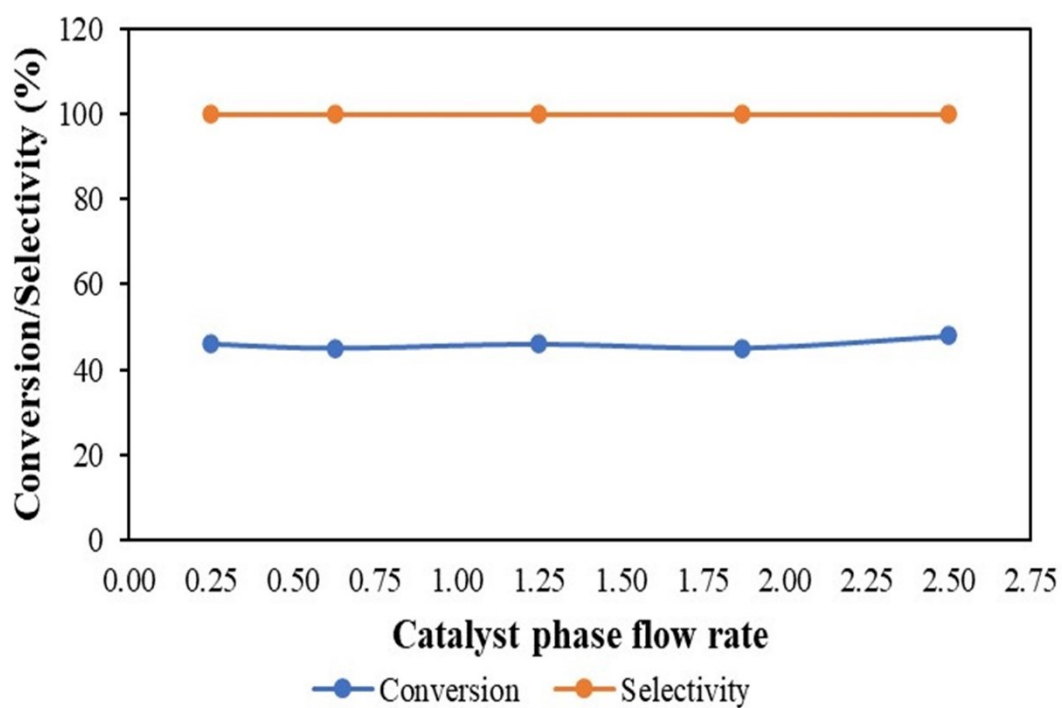

**Figure S13.** Effect of catalyst phase flow rate. 1-Naphthol 0.08 mol, sodium hydroxide 0.16 mol, epichlorohydrin 0.08 mol, tetra butyl ammonium bromide 0.09 mol, n-decane 0.016 mol, sodium chloride 0.39 mol, toluene 100 mL, water 100 mL, aqueous phase flow rate- 0.5 mL/min, organic phase flow rate- 0.5 mL/min, temperature- 30 °C.
